# Supplementary material for: A novel coumarin-based red fluorogen with AIE, self-assembly, and TADF properties
Source: Royal Society of Chemistry journal article supplement (doi:10.1039/c6nj01296e), 2016-01-01
Supplement: c6nj01296e1.pdf [file c6nj01296e1.pdf]

Electronic Supplementary Material (ESI) for New Journal of Chemistry.

This journal is © The Royal Society of Chemistry and the Centre National de la Recherche Scientifique  
2016

---

**A novel coumarin-based red fluorogen with AIE, Self-assembly, and TADF properties**

Li Qiang Yan, Zhi Neng Kong, Yong Xia and Zheng Jian Qi\*

College of Chemistry and Chemical engineering, Southeast University, Nanjing,  
Jiangsu, 210096, P.R. China.

E-mail: qizhengjian@seu.edu.cn; liqiangyan2014@163.com

**Contents**

Fig.S1. Compound CDPA  $^1\text{H}$  NMR ( $\text{CDCl}_3$ , 300 MHz).

Fig.S2 Compound CDPA  $^{13}\text{C}$  NMR ( $\text{CDCl}_3$ , 300 MHz).

Fig.S3. EI-MS of CDPA.

Fig.S4. FT-IR of CDPA powder (KBr).

Fig.S5. PLQY of CDPA powder, measured by integrating sphere,  $\lambda_{\text{ex}} = 395$  nm.

Fig.S6. PLQY of CDPA neat film, measured by integrating sphere,  $\lambda_{\text{ex}} = 395$  nm.

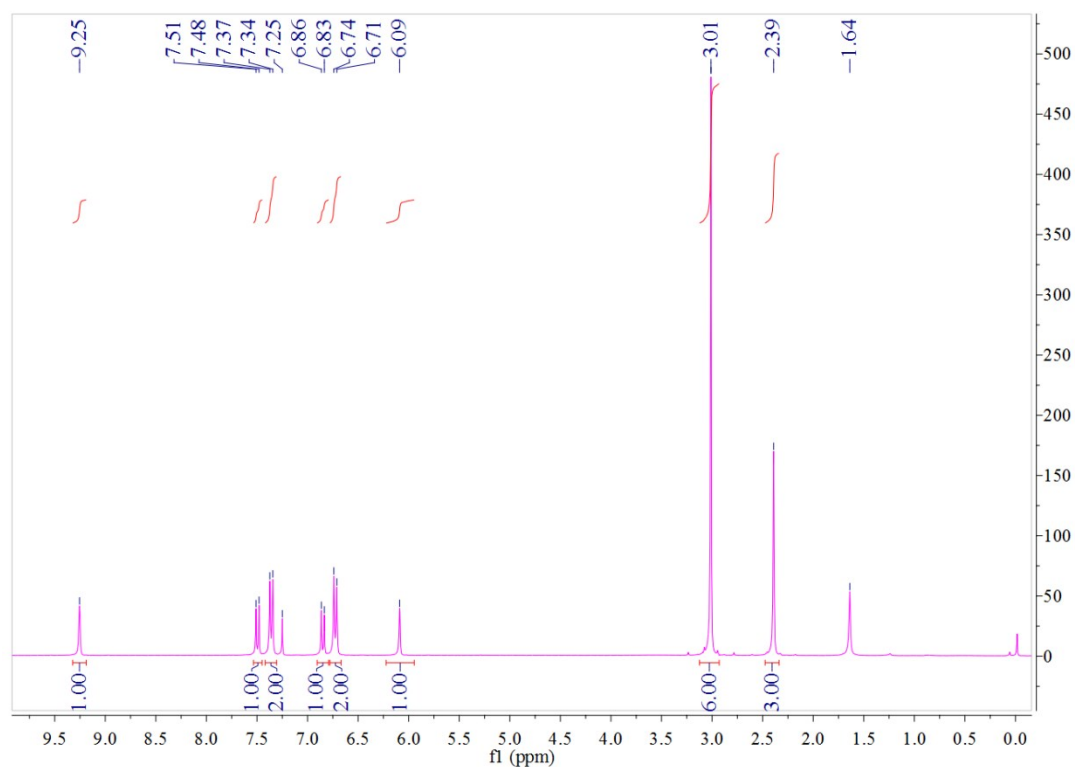

Fig.S1 Compound CDPA  $^1\text{H}$  NMR ( $\text{CDCl}_3$ , 300 MHz).

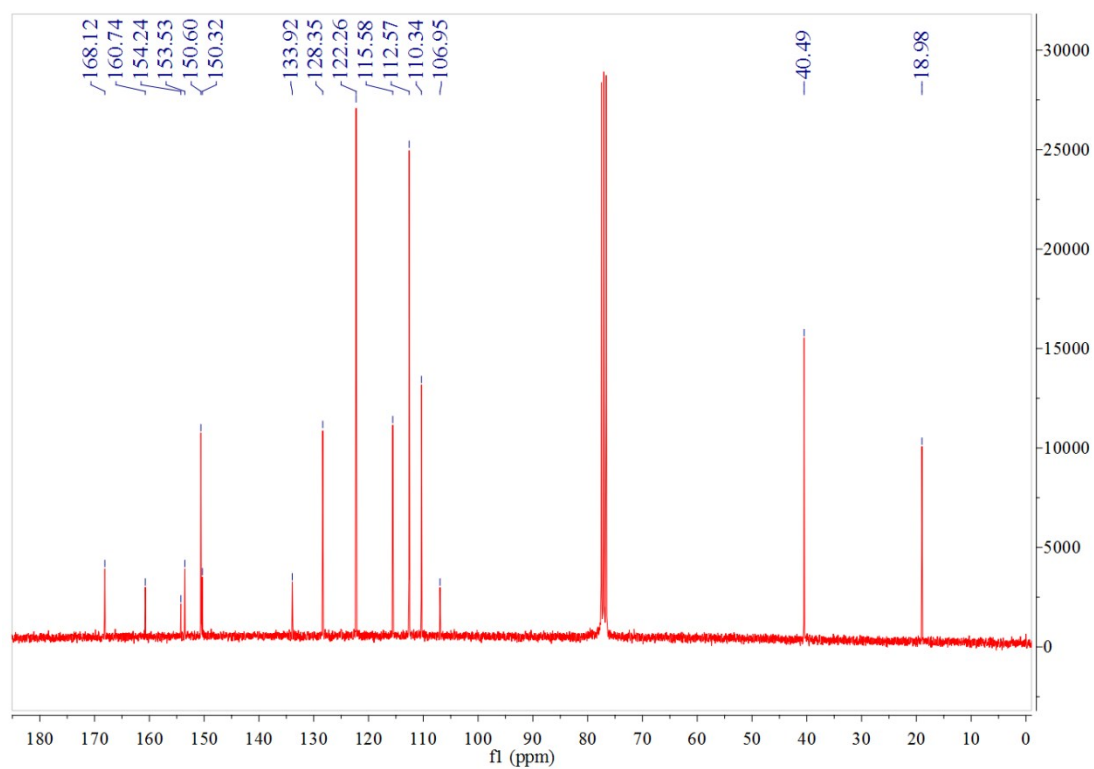

Fig.S2 Compound CDPA  $^{13}\text{C}$  NMR ( $\text{CDCl}_3$ , 300 MHz).

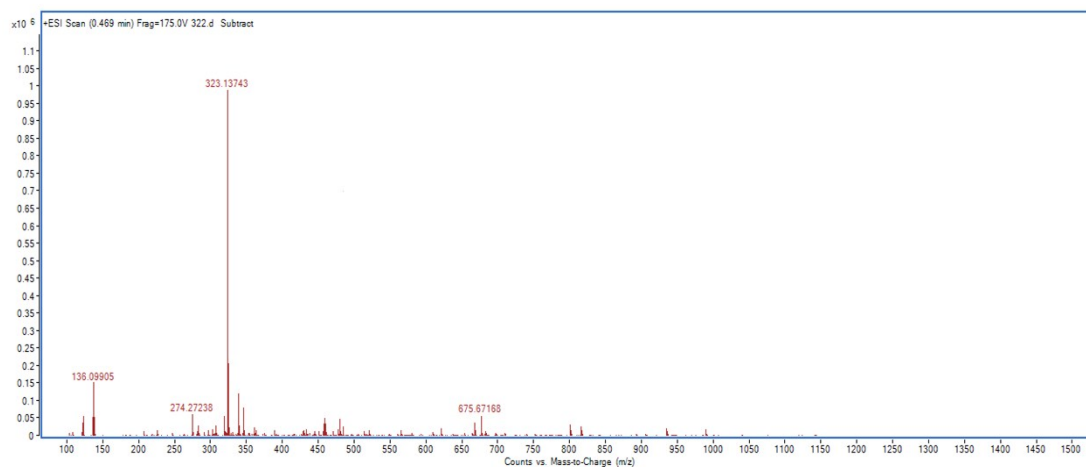

Fig.S3 EI-MS of CDPA.

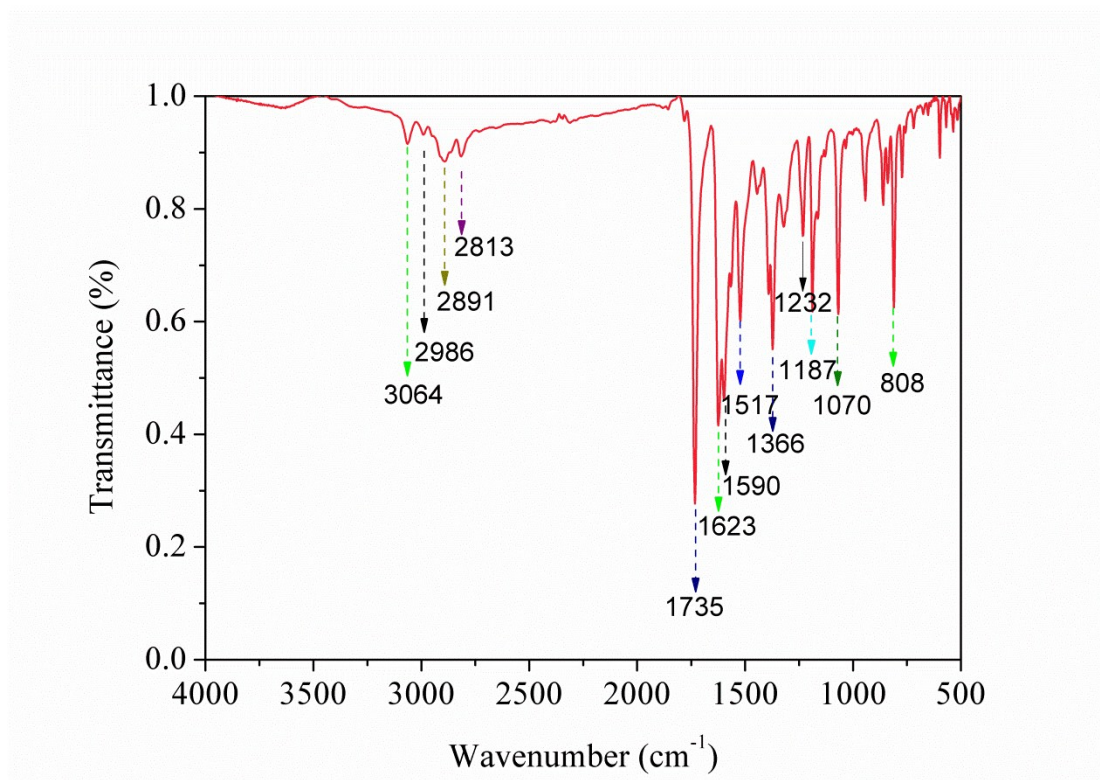

Fig.S4 FT-IR of CDPA powder (KBr).

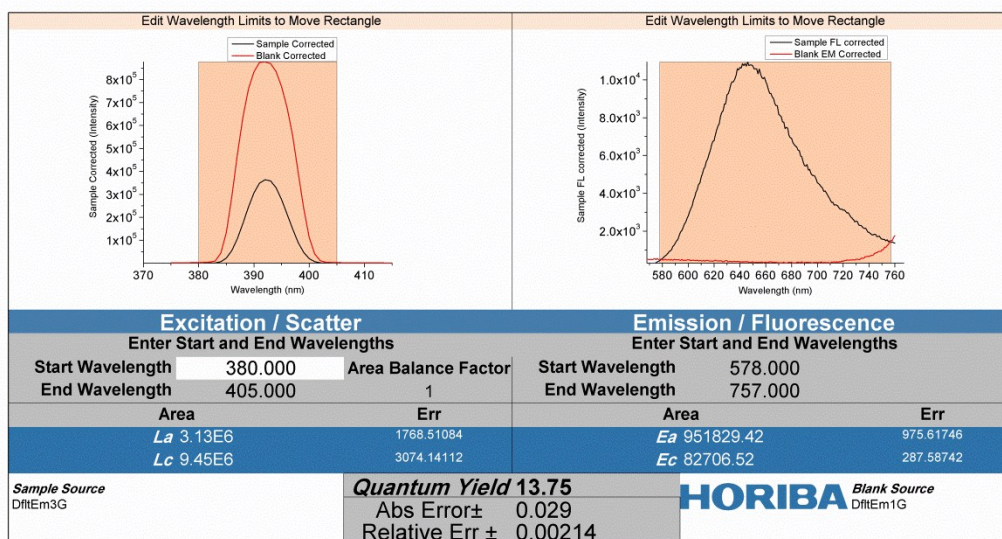Fig.S5. PLQY of CDPA powder, measured by integrating sphere,  $\lambda_{ex} = 395$  nm.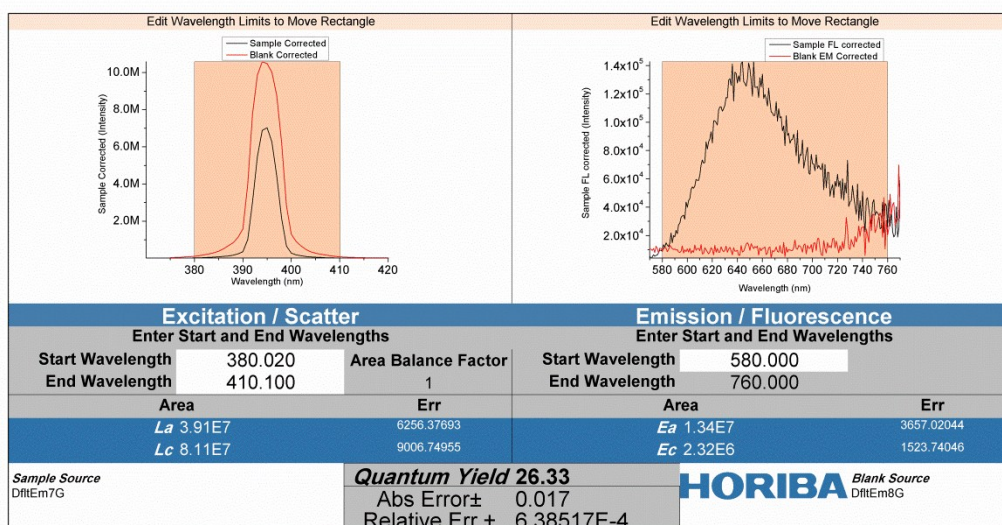Fig.S6 PLQY of CDPA neat film, measured by integrating sphere,  $\lambda_{ex} = 395$  nm.
